# Supplementary material
Source: PubMed Central journal article supplement (PMC4789858)
Supplement: misg893834.ww1_default.pdf [file misg893834.ww1_default.pdf]

Appendix 1: Factor loadings for each age for 695 women who reached natural menopause by 54 years

| Symptoms                                | Age        |            |            |            |            |            |            |            |
|-----------------------------------------|------------|------------|------------|------------|------------|------------|------------|------------|
|                                         | 47         | 48         | 49         | 50         | 51         | 52         | 53         | 54         |
| <i>Psychological symptoms</i>           |            |            |            |            |            |            |            |            |
| Anxiety and depression                  | 0.82       | 0.84       | 0.84       | 0.85       | 0.86       | 0.87       | 0.85       | 0.84       |
| Tearfulness                             | 0.79       | 0.80       | 0.79       | 0.80       | 0.79       | 0.79       | 0.81       | 0.75       |
| Irritability                            | 0.74       | 0.72       | 0.72       | 0.71       | 0.71       | 0.74       | 0.75       | 0.69       |
| Feelings of panic                       | 0.58       | 0.66       | 0.68       | 0.66       | 0.67       | 0.65       | 0.66       | 0.69       |
| Forgetfulness                           | 0.56       | 0.58       | 0.55       | 0.57       | 0.55       | 0.57       | 0.53       | 0.62       |
| Trouble Sleeping*                       | 0.40       | 0.40       | 0.45       | 0.45       | 0.44       | 0.42       | 0.51       | 0.44       |
| <i>Percent variance, Cronbach alpha</i> | 27.5, 0.82 | 26.5, 0.83 | 26.5, 0.83 | 25.4, 0.83 | 26.6, 0.81 | 26.3, 0.83 | 26.3, 0.85 | 26.3, 0.86 |
| <i>Somatic symptoms</i>                 |            |            |            |            |            |            |            |            |
| Pins and needles in hands and feet      | 0.63       | 0.70       | 0.61       | 0.67       | 0.69       | 0.69       | 0.67       | 0.69       |
| Dizziness                               | 0.61       | 0.51       | 0.54       | 0.65       | 0.60       | 0.52       | 0.56       | 0.63       |
| Skin-crawling sensations                | 0.59       | 0.61       | 0.55       | 0.55       | 0.50       | 0.52       | 0.55       | 0.49       |
| Palpitations                            | 0.48       | 0.36       | 0.46       | 0.40       | 0.29       | 0.41       | 0.39       | 0.40       |
| Increased frequency of passing urine    | 0.47       | 0.36       | 0.42       | 0.37       | 0.48       | 0.45       | 0.45       | 0.47       |
| Frequent severe headache                | 0.44       | 0.32       | 0.39       | 0.41       | 0.36       | 0.34       | 0.37       | 0.51       |
| Breast tenderness                       | 0.30       | 0.39       | 0.38       | 0.34       | 0.47       | 0.45       | 0.39       | 0.25       |
| Aches and pains in the joints           | 0.51       | 0.60       | 0.57       | 0.52       | 0.59       | 0.63       | 0.48       | 0.53       |
| <i>Percent variance, Cronbach alpha</i> | 7.3, 0.72  | 7.5, 0.66  | 8.3, 0.67  | 8.1, 0.66  | 8.1, 0.71  | 8.5, 0.69  | 8.9, 0.68  | 8.9, 0.69  |
| <i>Vasomotor symptoms</i>               |            |            |            |            |            |            |            |            |
| Cold sweats /night sweats               | 0.81       | 0.85       | 0.82       | 0.87       | 0.86       | 0.86       | 0.84       | 0.85       |
| Hot flushes                             | 0.82       | 0.82       | 0.81       | 0.87       | 0.86       | 0.88       | 0.86       | 0.84       |
| <i>Percent variance, Cronbach alpha</i> | 5.8, 0.81  | 6.9, 0.82  | 6.7, 0.84  | 7.3, 0.87  | 7.3, 0.83  | 6.8, 0.88  | 7.4, 0.89  | 6.7, 0.88  |
| <i>Sexual difficulties</i>              |            |            |            |            |            |            |            |            |
| Difficulties with intercourse           | 0.86       | 0.88       | 0.88       | 0.90       | 0.90       | 0.90       | 0.92       | 0.92       |
| Vaginal dryness                         | 0.87       | 0.87       | 0.88       | 0.92       | 0.90       | 0.90       | 0.92       | 0.91       |
| <i>Percent variance, Cronbach alpha</i> | 6.6, 0.81  | 6.0, 0.82  | 6.0, 0.84  | 6.3, 0.87  | 5.9, 0.83  | 6.1, 0.88  | 6.0, 0.89  | 5.9, 0.88  |

\* Trouble sleeping also loaded on vasomotor symptoms but with lower loadings than for the psychological symptoms group.
